# Supplementary material for: Specific recognition of reproductive parasite workers by nest-entrance guards in the bumble bee Bombus terrestris
Source: PubMed Central journal article supplement (PMC3878879; doi:10.1186/1742-9994-10-74), 2013-12-10
Supplement: 1742-9994-10-74-S1.pdf [file 1742-9994-10-74-S1.pdf]

| Peak no. | Compound                  | Peak no. | Compound                        |
|----------|---------------------------|----------|---------------------------------|
| 1        | Heneicosane               | 21-23    | Nonacosene (3 isomers)*         |
| 2        | Docosane                  | 24       | Nonacosane                      |
| 3        | Tricosene                 | 25-27    | Triacontene (3 isomers)*        |
| 4        | Tricosane                 | 28       | Triacontane                     |
| 5        | Tetracosane *             | 29-32    | Hentriacontadiene (4 isomers)   |
| 6-7      | Pentacosene (2 isomers) * | 33-34    | Hentriacontene (2 isomers)*     |
| 8        | Pentacosane               | 35       | Hentriacontane                  |
| 9        | Hexacosane                | 36       | Dotriacontene                   |
| 10-13    | Heptacosene (4 isomers)   | 37-40    | Tritriacontadiene (4 isomers)   |
| 14       | Heptacosane               | 41-43    | Pentatriacontadiene (3 isomers) |
| 15-16    | Octacosene (2 isomers) *  | 44       | Hexadecyl 9-octadecenoate       |
| 17       | Octacosane                | 45       | Icosyl hexadecanoate            |
| 18-20    | Nonacosadiene (3 isomers) |          |                                 |
