# Supplementary material for: Specific recognition of reproductive parasite workers by nest-entrance guards in the bumble bee Bombus terrestris
Source: PubMed Central journal article supplement (PMC3878879; doi:10.1186/1742-9994-10-74), 2013-12-10
Supplement: 1742-9994-10-74-S3.pdf [file 1742-9994-10-74-S3.pdf]

| workers' ovarian development      |              |                 |              |             |
|-----------------------------------|--------------|-----------------|--------------|-------------|
| compound                          | low (n = 45) | medium (n = 35) | high (n=36)  | Pearson's r |
| tetracosane                       | 0.42 ± 0.02  | 0.49 ± 0.02     | 0.70 ± 0.03  | 0.63        |
| pentacosane                       | 13.77 ± 0.68 | 16.26 ± 0.63    | 22.17 ± 0.99 | 0.62        |
| hexacosane                        | 0.88 ± 0.04  | 1.05 ± 0.05     | 1.28 ± 0.03  | 0.61        |
| heptacosene (four isomers)        | 1.69 ± 0.08  | 1.35 ± 0.11     | 0.93 ± 0.04  | -0.55       |
| octacosene (two isomers)          | 0.41 ± 0.02  | 0.29 ± 0.02     | 0.17 ± 0.01  | -0.69       |
| nonacosene (three isomers)        | 13.94 ± 0.62 | 9.76 ± 0.67     | 5.31 ± 0.22  | -0.75       |
| triacontene (three isomers)       | 0.80 ± 0.02  | 0.70 ± 0.03     | 0.47 ± 0.02  | -0.64       |
| hentriacontene (two isomers)      | 12.63 ± 0.41 | 10.98 ± 0.40    | 8.23 ± 0.38  | -0.61       |
| pentatriacontadiene (two isomers) | 0.15 ± 0.01  | 0.27 ± 0.03     | 0.42 ± 0.02  | 0.67        |
