# Supplementary material for: Specific recognition of reproductive parasite workers by nest-entrance guards in the bumble bee Bombus terrestris
Source: PubMed Central journal article supplement (PMC3878879; doi:10.1186/1742-9994-10-74), 2013-12-10

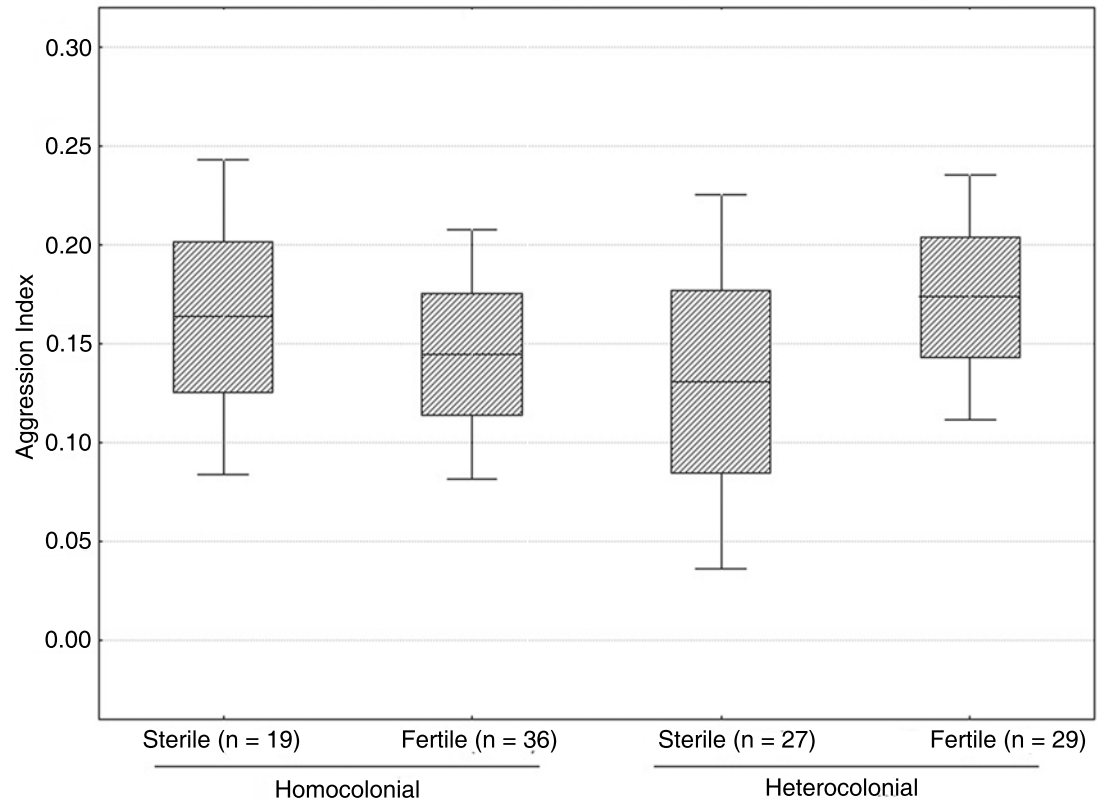

Supplement: 1742-9994-10-74-S4.pdf [file 1742-9994-10-74-S4.pdf]
